# Supplementary material for: GDF11 induces mild hepatic fibrosis independent of metabolic health
Source: Aging (Albany NY). 2020 Oct 28;12(20):20024–46. doi: 10.18632/aging.104182 (PMC7655202; doi:10.18632/aging.104182)
Supplement: Supplementary File 1 [file aging-12-104182-s003..xlsx]

## Sheet: Sheet1
Supplementary File 1. All deregulated genes in total liver mRNA from GDF11 treated ob/ob mice (N=3 per group, CTL and GDF11). The quantitative values are expressed as median fold changes, where >0 = Upregulation and <0 = Downregulation
Gene	p-value	log2 Fold Change
Mb	4.44242e-08	21.394
Tnnc2	1.61073e-07	20.4832
Fam177a	0.0281504	8.5803
Cox6a2	0.0477516	7.74056
Myl1	0.0568578	7.44425
Myot	0.0598755	7.35986
Myl3	0.0682517	7.13296
Tnni2	0.0420293	7.04529
Myh1	0.0793607	6.86517
Gm25432	0.0841058	6.7601
Trdn	0.0871819	6.69454
Atp2a1	0.0871819	6.69454
Ckm	0.0901589	6.63286
Fabp3	0.0948971	6.4459
Tcap	0.102722	6.38943
Cmya5	0.113768	6.19441
Gm13102	0.115991	6.157
Xirp2	0.124896	6.01263
Myoz2	0.124896	6.01263
Mybpc1	0.124896	6.01263
Myl2	0.131392	5.91237
Cox8b	0.131392	5.91237
Ak1	0.135308	5.85378
Kiss1	0.144908	5.71556
Mup-ps14	0.152863	5.60631
Smpx	0.156225	5.56147
Gm23472	0.146234	5.55287
Ppp1r27	0.168189	5.40761
Cilp	0.173665	5.33998
Ckmt2	0.169576	5.33774
Eef1a2	0.179565	5.26889
Gm5844	0.00756531	5.17118
Abra	0.194465	5.09686
Casq2	0.203148	5.00111
Sap25	0.000565297	4.94247
Gm45315	0.0318351	4.88612
Zfp781	0.00927448	4.84953
Trim63	0.0343833	4.84333
2310002L09Rik	0.0343833	4.84333
Myh7	0.0343833	4.84333
Nbeal2	0.0059204	4.7806
Tenm1	0.23448	4.68707
Gm37863	0.0295162	4.64489
Pvalb	0.0525649	4.61697
Gm8258	0.0525649	4.61697
Yipf7	0.0525649	4.61697
Gm47450	0.0335603	4.61125
Tmod4	0.0335603	4.61125
Tmem182	0.240923	4.5997
4930534H18Rik	0.0252782	4.51015
Prkag3	0.00863049	4.4421
Gm22063	0.0825114	4.34956
Gm11032	0.0825114	4.34956
Gm24019	0.0825114	4.34956
Gm24863	0.0825114	4.34956
Thbs4	0.0825114	4.34956
Smtnl1	0.0825114	4.34956
Gm47408	0.0562156	4.34825
Igfbp6	0.0369264	4.34183
Rpl3l	0.0586124	4.32392
Ldb3	0.00997898	4.29806
Gm25147	0.0710191	4.20919
Fxyd6	0.0710191	4.20919
Nrap	0.0791601	4.18747
Olfr93	0.0751657	4.18265
Galnt12	0.0808402	4.17387
Gm7909	0.0774103	4.16915
Gm12666	0.115675	4.15414
Ttll13	0.0223951	4.13539
Sln	0.292502	4.13508
Aspn	0.0318079	4.03832
Sirpb1a	0.100639	4.02743
Lep	0.133173	4.0227
Gm43694	0.133173	4.0227
Tnni1	0.133173	4.0227
Tbx15	0.133173	4.0227
Timp4	0.133173	4.0227
Myf6	0.133173	4.0227
Mlf1	0.133173	4.0227
Olfr105-ps	0.0720415	4.0214
Gm50152	0.0813758	4.00137
E330032C10Rik	0.102029	3.99856
Gm14698	0.146468	3.98515
Gm4779	0.0647925	3.95007
Gm10933	0.0416498	3.90807
Gm18943	0.127891	3.88964
1700105G05Rik	0.125315	3.87366
Gm2033	0.0517518	3.8625
Gm13305	0.128413	3.85724
Tnfsfm13	0.0177363	3.84352
Mrc2	0.101137	3.84143
Mfap5	0.13683	3.82344
Ucp3	0.13996	3.80606
Gm31513	0.13996	3.80606
Gsdmcl2	0.13657	3.80524
Il1rl1	0.140924	3.80309
Fam220a	0.0268884	3.78602
BB123696	0.05031	3.69727
Olfr887	0.209575	3.69026
Gm10155	0.209575	3.69026
C730027H18Rik	0.0331542	3.65589
Gm14966	0.0502696	3.65095
Gm2735	0.173413	3.64375
AC160138.1	0.143386	3.64173
Gm44037	0.0511246	3.63941
Gm37668	0.179322	3.62406
Gm18985	0.179322	3.62406
Gm43190	0.179322	3.62406
Gm2539	0.143538	3.62264
V1ra8	0.143538	3.62264
Tafa3	0.17541	3.62105
Oit1	0.17541	3.62105
Gm23992	0.17541	3.62105
Gm49430	0.17541	3.62105
Gm38056	0.0676617	3.61402
Cdk3	0.150995	3.60345
Gm19353	0.189873	3.60291
Pgam2	0.221125	3.60202
Ano5	0.221125	3.60202
Cavin4	0.221125	3.60202
Actn2	0.221125	3.60202
Ccl28	0.221125	3.60202
C330002G04Rik	0.221125	3.60202
Gm37245	0.221125	3.60202
Gm47459	0.221125	3.60202
Gm16374	0.221125	3.60202
Gm6402	0.221125	3.60202
Asb15	0.221125	3.60202
Bves	0.221125	3.60202
Gm3294	0.221125	3.60202
Gm2308	0.221125	3.60202
Hrc	0.221125	3.60202
Ppp1r3a	0.221125	3.60202
Scara5	0.181405	3.59784
Ifnlr1	0.152077	3.59028
Rgsl1	0.152077	3.59028
Olfr465-ps1	0.152077	3.59028
4933417D19Rik	0.152077	3.59028
Gm13928	0.183981	3.58122
Gm17823	0.183981	3.58122
Gm50083	0.238622	3.57224
Gm18716	0.085655	3.57017
Slc35g2	0.101094	3.55741
Gm15542	0.0823375	3.55717
Olfr1254	0.192995	3.54696
5031434O11Rik	0.192344	3.53498
Grm1	0.000673063	3.5277
Gm7712	0.168608	3.52429
Sez6l2	0.196306	3.52288
Limch1	2.23989e-05	3.51
Gm5857	0.100356	3.5099
Gm8369	0.165263	3.44301
Gm48094	0.274874	3.4282
Cpt1b	0.274874	3.4282
4930420G21Rik	0.274874	3.4282
9130208D14Rik	0.235104	3.41417
Gm49479	0.086308	3.41239
Olfr1393	0.0847794	3.40227
Enho	0.0863527	3.40191
Vmn2r29	0.236097	3.39068
Snord59a	0.236097	3.39068
Plin1	0.149349	3.37011
Gm31693	0.241787	3.36978
Gm45191	0.0929574	3.35305
Efcab11	0.253215	3.34516
9030624G23Rik	0.253215	3.34516
Gm30173	0.253215	3.34516
Sh3bgr	0.158312	3.34242
Ly6f	0.245149	3.34009
Fgf18	0.245149	3.34009
Adam28	0.0349137	3.33886
Adipoq	0.28905	3.33427
Gm13215	0.254042	3.32034
Gm49046	0.254042	3.32034
Zscan2	0.251122	3.31597
Osbpl6	0.251122	3.31597
Rnf222	0.251122	3.31597
Pi15	0.251122	3.31597
Olfr381	0.251122	3.31597
Gfap	0.251122	3.31597
Pcdhb12	0.251122	3.31597
Hs6st2	0.251122	3.31597
Gm43203	0.251122	3.31597
Gm47265	0.251122	3.31597
Itgb1bp2	0.251122	3.31597
2610042L04Rik	0.251122	3.31597
Asprv1	0.307118	3.31039
Poln	0.094733	3.29554
Nfasc	0.260403	3.2904
Phf21b	0.173222	3.28265
Wdr66	0.139199	3.2799
Parvg	0.0779473	3.27267
D330050I16Rik	0.0450895	3.2493
Gm37829	0.11233	3.24027
Gm13205	0.107768	3.23661
Hsf5	0.135874	3.23492
Gm40649	0.110211	3.22405
Vmn1r80	0.122882	3.20058
Gm10037	0.121834	3.19771
Casq1	0.412209	3.18088
Lrrc49	0.137864	3.16561
Tmem151a	0.167052	3.14036
Sycp2	0.305499	3.12872
Large2	0.139714	3.10776
Snord14a	0.362767	3.10733
Sycp3	0.362767	3.10733
Ctrl	0.362767	3.10733
Vwf	9.21334e-06	3.10146
Gm44249	0.323092	3.08791
Gm26902	0.323092	3.08791
9830004L10Rik	0.323092	3.08791
Gm45204	0.143672	3.07207
Platr14	0.323074	3.06817
Wdr63	0.327866	3.06031
Dmkn	0.327866	3.06031
Fsip1	0.325196	3.05552
Lrrc24	0.325196	3.05552
Gm10384	0.325196	3.05552
Gm37893	0.325196	3.05552
Gm47789	0.325196	3.05552
Gm16302	0.325196	3.05552
Gm44742	0.325196	3.05552
Pif1	0.325196	3.05552
Tmppe	0.325196	3.05552
Gm34368	0.325196	3.05552
Gm49389	0.325196	3.05552
Des	0.177155	3.05162
Gm28652	0.177155	3.05162
Gja8	0.184929	3.0397
Gm11815	0.0471493	3.03497
Tpbg	0.339837	3.03057
Gm38297	0.339837	3.03057
Gm48349	0.339837	3.03057
Pnpla3	0.339837	3.03057
Gm5426	0.339837	3.03057
Gm42897	0.339837	3.03057
Gm42928	0.16055	3.0238
Zfp811	0.158871	3.02257
Inka2	0.1834	3.02141
Gm38111	0.181402	3.02025
Def6	0.296478	3.02019
H2-T3	0.296478	3.02019
Olfr1220	0.296478	3.02019
Gm42918	0.296478	3.02019
Rpl32l	0.296478	3.02019
n-R5s102	0.0999837	3.01261
Fcrla	0.0664996	3.0109
Myh4	0.377089	3.01033
Etv4	0.377089	3.01033
Gabrp	0.377089	3.01033
Ppp1r1a	0.377089	3.01033
Ip6k3	0.377089	3.01033
Myoc	0.377089	3.01033
Dcx	0.377089	3.01033
9530077C05Rik	0.377089	3.01033
Klhl31	0.377089	3.01033
Mylk4	0.377089	3.01033
Vgll2	0.377089	3.01033
Six1	0.377089	3.01033
Smim10l2a	0.377089	3.01033
Rnf212	0.377089	3.01033
3425401B19Rik	0.377089	3.01033
Gal3st2c	0.377089	3.01033
Gm23766	0.377089	3.01033
Tceal7	0.377089	3.01033
Gm5639	0.377089	3.01033
Gm15179	0.377089	3.01033
5330439K02Rik	0.377089	3.01033
Gm38025	0.377089	3.01033
Gm44050	0.377089	3.01033
Gm32849	0.377089	3.01033
4831440D22Rik	0.377089	3.01033
A230081H15Rik	0.377089	3.01033
Gm40689	0.377089	3.01033
Gm47808	0.377089	3.01033
Klhl30	0.377089	3.01033
Thbs3	0.377089	3.01033
Dhrs7c	0.377089	3.01033
Baiap3	0.377089	3.01033
Lrrc30	0.377089	3.01033
Dcdc2b	0.377089	3.01033
Gm26815	0.377089	3.01033
Gm29596	0.377089	3.01033
Gm37465	0.377089	3.01033
Gm44007	0.377089	3.01033
Gm44428	0.377089	3.01033
Gm34885	0.377089	3.01033
Gm40645	0.377089	3.01033
Gm48798	0.377089	3.01033
P2ry10	0.341811	2.9967
Shisa4	0.341811	2.9967
Zfa-ps	0.341811	2.9967
Snord22	0.341811	2.9967
Olfr366	0.341811	2.9967
Gm43821	0.341811	2.9967
Tmem202	0.35143	2.99101
Vax2os	0.346622	2.99087
Wnk2	0.397087	2.98977
Vill	0.397087	2.98977
Gm19035	0.397087	2.98977
Gm3272	0.397087	2.98977
Gm11027	0.397087	2.98977
Gm12978	0.397087	2.98977
4930405A21Rik	0.397087	2.98977
5330411J11Rik	0.397087	2.98977
Gm33594	0.397087	2.98977
Gm39312	0.397087	2.98977
Gm18289	0.397087	2.98977
Gm30262	0.0973133	2.974
Tlr8	0.0909703	2.9468
Atcayos	0.246404	2.93964
Gm48740	0.20261	2.93899
Zg16	0.316464	2.92703
Gm25173	0.0492	2.91616
Gm22805	0.182992	2.91255
Gnao1	0.0947405	2.90597
Olfr31	0.216029	2.88431
CT010467.1	0.212788	2.88326
Gm38336	0.184036	2.8811
Gm19040	0.184036	2.8811
Vmn2r83	0.193704	2.87363
Myoz1	0.185836	2.86794
Gm10999	0.196841	2.86455
Cd4	0.238984	2.86127
Kirrel3	0.192893	2.85832
Gm9926	0.19069	2.85745
March3	0.231349	2.84102
Gm44103	0.22833	2.83889
Gm44224	0.227975	2.83384
Sgip1	0.211894	2.83338
4921514A10Rik	0.23236	2.82135
Mylpf	0.128917	2.80241
Fap	0.240828	2.80021
Meg3	8.61953e-05	2.76346
Ryr1	0.24988	2.74942
Gm11549	0.119002	2.73372
Itm2a	0.141729	2.72695
Gpr153	0.190214	2.72251
Arhgef4	0.431687	2.71443
Gm15788	0.278818	2.71409
Slc25a31	0.260326	2.71344
4933417C20Rik	0.141061	2.70813
Gm37124	0.266843	2.69834
4930539E08Rik	0.155833	2.69662
Gm43947	0.262216	2.69607
Syngr3	0.481053	2.69498
Chodl	0.481053	2.69498
3110062G12Rik	0.481053	2.69498
Gm11879	0.481053	2.69498
Gm18899	0.481053	2.69498
Gm22306	0.481053	2.69498
Gm23248	0.481053	2.69498
Gm12294	0.481053	2.69498
Gm2568	0.481053	2.69498
Gm16063	0.481053	2.69498
Gm24498	0.481053	2.69498
Gm42681	0.481053	2.69498
Gm48632	0.481053	2.69498
Pcdhb20	0.267084	2.69466
Gm28809	0.122365	2.67805
Gm38200	0.274007	2.67558
Gm45399	0.445703	2.67173
Gm10286	0.445703	2.67173
Gm42765	0.445703	2.67173
Gm43896	0.445703	2.67173
Gm32219	0.445703	2.67173
Ccn3	0.445703	2.67173
Foxp3	0.445703	2.67173
Olfr640	0.445703	2.67173
Gm44668	0.445703	2.67173
Hbq1a	0.445703	2.67173
Gm37463	0.445703	2.67173
Gm42421	0.445703	2.67173
Gm35572	0.445703	2.67173
Gm8795	0.445703	2.67173
Synb	0.445703	2.67173
Gm22030	0.445703	2.67173
Gm37409	0.240277	2.65996
4930528D03Rik	0.239362	2.65994
Gm48998	0.239362	2.65994
Gm13855	0.239362	2.65994
Gm15690	0.282753	2.65575
Gm21056	0.316977	2.65565
Gm37846	0.187837	2.64661
D030028A08Rik	0.128017	2.64433
Gm7437	0.248387	2.64134
Gm37169	0.455959	2.64088
Gm12763	0.455959	2.64088
Lurap1	0.455959	2.64088
C1ql4	0.455959	2.64088
Dppa3	0.455959	2.64088
Dmrt2	0.455959	2.64088
Slc14a1	0.455959	2.64088
Scn2a	0.455959	2.64088
Col6a5	0.455959	2.64088
4930596I21Rik	0.455959	2.64088
1700065D16Rik	0.336266	2.63368
Lrrc75b	0.111583	2.62055
Hmgb1-ps6	0.326834	2.61306
Gm21860	0.326834	2.61306
Gm47339	0.258792	2.61264
Gm38128	0.256115	2.61127
Ranbp17	0.189734	2.61122
Gm37370	0.323873	2.61085
Gm44129	0.322978	2.61017
Usp13	0.322978	2.61017
Gm9465	0.285144	2.60262
Gm45494	0.216385	2.60182
Il18rap	0.51138	2.60137
Mafa	0.51138	2.60137
9130008F23Rik	0.51138	2.60137
Gm8822	0.51138	2.60137
Gm42499	0.51138	2.60137
4933417G07Rik	0.51138	2.60137
Gm49666	0.51138	2.60137
Ica1l	0.51138	2.60137
Gm9967	0.51138	2.60137
Rtl6	0.51138	2.60137
Gm10392	0.51138	2.60137
Olfr1135	0.51138	2.60137
Gm29554	0.51138	2.60137
Gm42732	0.51138	2.60137
Gm8556	0.51138	2.60137
Myo9b	0.0288992	2.59294
Aqp7	0.383884	2.58892
Ppp1r3f	0.385973	2.58733
A330076C08Rik	0.456919	2.58676
Stxbp5l	0.456919	2.58676
Cacna1s	0.456919	2.58676
Gp9	0.456919	2.58676
Pnliprp1	0.456919	2.58676
Gm14599	0.456919	2.58676
Gm6222	0.456919	2.58676
Gm22988	0.456919	2.58676
B430119L08Rik	0.456919	2.58676
Gm15708	0.456919	2.58676
Speer5-ps1	0.456919	2.58676
Gm43674	0.456919	2.58676
Gm48334	0.456919	2.58676
Gm6983	0.456919	2.58676
4930477N07Rik	0.456919	2.58676
1700022H01Rik	0.456919	2.58676
Gm35769	0.456919	2.58676
Rpl27a-ps1	0.456919	2.58676
Gm5570	0.456919	2.58676
Gm23751	0.456919	2.58676
Gm10766	0.456919	2.58676
4930537H20Rik	0.456919	2.58676
Gm45236	0.456919	2.58676
Gm47218	0.456919	2.58676
Gm34680	0.456919	2.58676
Srpk3	0.456919	2.58676
Galnt9	0.456919	2.58676
Slc25a2	0.456919	2.58676
Gm45493	0.456919	2.58676
Aldh1a2	0.456919	2.58676
Rtn4r	0.456919	2.58676
Tmem215	0.456919	2.58676
Osr1	0.456919	2.58676
Plcxd3	0.456919	2.58676
Gm12018	0.456919	2.58676
9930004E17Rik	0.456919	2.58676
Gm45105	0.456919	2.58676
Gm48089	0.456919	2.58676
Gm50433	0.456919	2.58676
Fam189a1	0.456919	2.58676
Olfr305	0.456919	2.58676
Vmn1r82	0.456919	2.58676
Dnase1	0.218667	2.58456
4933427D14Rik	0.0741312	2.55806
Scube1	0.308536	2.55658
Lmod2	0.069052	2.54685
Scn2b	0.158226	2.54378
Mypn	0.416936	2.53577
Gm6525	0.156632	2.53504
Tfap2a	0.471053	2.53138
Gfi1	0.471053	2.53138
Fv1	0.471053	2.53138
Olfr898	0.471053	2.53138
Gm44198	0.471053	2.53138
Smcp	0.471053	2.53138
Gm36823	0.471053	2.53138
Klra17	0.471053	2.53138
Ssc5d	0.471053	2.53138
Arhgap33	0.471053	2.53138
Gm10382	0.471053	2.53138
Gm15880	0.471053	2.53138
Parvaos	0.471053	2.53138
4933427J07Rik	0.471053	2.53138
Gm28502	0.471053	2.53138
Gm43400	0.471053	2.53138
Gm42849	0.471053	2.53138
Gm36378	0.471053	2.53138
Gm48884	0.471053	2.53138
Gm49513	0.471053	2.53138
Asb10	0.471053	2.53138
Sorcs3	0.471053	2.53138
Gm14039	0.471053	2.53138
Gm16299	0.471053	2.53138
Ces2h	0.471053	2.53138
Gm47093	0.471053	2.53138
Gm4166	0.471053	2.53138
Foxred2	0.471053	2.53138
Ccl11	0.471053	2.53138
Chst10	0.471053	2.53138
Scube3	0.471053	2.53138
Emx2os	0.471053	2.53138
Gm32486	0.471053	2.53138
Gm47439	0.471053	2.53138
Gm42728	0.160329	2.52596
Rasgrp4	0.207969	2.52192
Lrriq1	0.485364	2.51372
Gm21814	0.486354	2.51083
Pkn3	0.159099	2.50601
Gm17657	0.200377	2.49834
Zfp558	0.324425	2.48352
Slc22a21	0.0321716	2.47834
Gm26531	0.369042	2.47828
Kif14	0.370388	2.478
1810014P07Rik	0.374844	2.47708
Aff3	0.185685	2.47253
5730435O14Rik	0.179555	2.46476
Olfr767	0.339854	2.46474
Pcdhgb5	0.195721	2.461
Castor2	3.2083e-05	2.45856
Gm50314	0.166905	2.45273
Klhl41	0.189772	2.45252
Gm49391	0.121345	2.45093
Gm2531	0.253971	2.44731
Gm11560	0.334254	2.4463
Acsbg1	0.335612	2.44592
H19	0.317018	2.44554
Slco4a1	0.340116	2.44468
Frmd3	0.208231	2.43606
Pdlim3	0.235458	2.4274
Grip2	0.340683	2.42445
Gm22426	0.340683	2.42445
1700027J07Rik	0.347082	2.42419
D630003M21Rik	0.34207	2.42404
Rbm3os	0.34206	2.42364
Corin	0.12706	2.42077
Clcn1	0.363676	2.41557
BC051142	0.334021	2.41362
Ppp1r9a	0.000203538	2.41348
Lmcd1	0.200147	2.41148
Rims2	0.192279	2.40636
Gm26930	0.354815	2.39999
Gm24245	0.359464	2.3986
Gm49883	0.320646	2.39815
Gm44430	0.320646	2.39815
Tmem262	0.320646	2.39815
4930540M05Rik	0.320646	2.39815
Gm43961	0.320646	2.39815
Gm37965	0.317035	2.39773
Gm38374	0.317035	2.39773
Gm12385	0.315947	2.39761
Zfp651	0.194414	2.39498
Gm37381	0.34758	2.39209
C1qtnf5	0.130808	2.39145
Gm31645	0.0563985	2.38832
D230049E03Rik	0.11446	2.38781
Gm47036	0.136561	2.38513
Olfr1438-ps1	0.327094	2.37572
Syt4	0.327094	2.37572
Gm13886	0.327094	2.37572
Gm17399	0.327094	2.37572
Gm43780	0.327094	2.37572
4930517E14Rik	0.327094	2.37572
Gm30655	0.323402	2.37536
Col11a2	0.32229	2.37525
Sv2a	0.426584	2.37502
Gm8189	0.356714	2.36633
Frem1	0.28171	2.35808
Bcl11b	0.363017	2.35513
Gm13238	0.361785	2.35504
Clec12b	0.360881	2.35214
Gm45022	0.360881	2.35214
Chrna1	0.359869	2.35148
Esrp1	0.359869	2.35148
Speg	0.232598	2.34559
Med12	0.287246	2.3429
Prr15l	0.202584	2.3403
Nlrp9b	0.371137	2.33016
Gm37951	0.371137	2.33016
Gm14102	0.367724	2.32799
Stac3	0.366696	2.32732
Gm45172	0.366696	2.32732
Gm49686	0.366696	2.32732
Krt19	0.366696	2.32732
Gm12743	0.366696	2.32732
Pmepa1os	0.366696	2.32732
L1cam	0.450139	2.32371
Stra8	0.3839	2.31897
Amigo1	0.248417	2.3178
Olfr243	0.140652	2.30948
Adcy10	0.372796	2.30941
Gm37368	0.255901	2.29063
Spo11	0.375082	2.28722
Gm26901	0.00851416	2.28511
Marveld3	0.120551	2.28343
Lrfn1	0.428831	2.2823
I730030J21Rik	0.267581	2.27856
Gm15903	0.0204698	2.27508
5830444B04Rik	0.0542073	2.26515
Cfd	0.0989267	2.26122
Gm37090	0.107882	2.25554
Scn4b	0.191285	2.2516
Hcrtr2	0.40538	2.24627
Gm50149	0.160282	2.24567
Lime1	0.0668731	2.24352
Arhgap20	0.578598	2.24285
Ptn	0.578598	2.24285
Rpl17-ps1	0.578598	2.24285
Gm26826	0.578598	2.24285
Gm26839	0.578598	2.24285
Gm38029	0.578598	2.24285
Gm48808	0.578598	2.24285
Gm2027	0.578598	2.24285
Gm19276	0.578598	2.24285
Gm36169	0.578598	2.24285
Dlx2	0.578598	2.24285
Gm9800	0.578598	2.24285
Olfr352	0.578598	2.24285
Olfr183	0.578598	2.24285
Olfr20	0.578598	2.24285
Gm8054	0.578598	2.24285
Spx	0.578598	2.24285
Tent5d	0.578598	2.24285
Zfp972	0.578598	2.24285
Aldh3b2	0.578598	2.24285
Snord90	0.578598	2.24285
Fam205a4	0.578598	2.24285
Gm20878	0.578598	2.24285
Kifc1	0.578598	2.24285
Gm12902	0.578598	2.24285
Gm15707	0.578598	2.24285
Gm15222	0.578598	2.24285
Gm16096	0.578598	2.24285
Gm21596	0.578598	2.24285
Gm29609	0.578598	2.24285
Gm43266	0.578598	2.24285
Gm44256	0.578598	2.24285
Gm44417	0.578598	2.24285
Gm44949	0.578598	2.24285
Gm31614	0.578598	2.24285
Gm34829	0.578598	2.24285
Gm47718	0.578598	2.24285
Gm32455	0.578598	2.24285
Gm49124	0.578598	2.24285
Cd40lg	0.578598	2.24285
Vmn1r209	0.578598	2.24285
Gm13094	0.578598	2.24285
Gm15958	0.578598	2.24285
Xist	0.578598	2.24285
Gm16093	0.578598	2.24285
Gm23034	0.578598	2.24285
A430057M04Rik	0.578598	2.24285
Gm5828	0.578598	2.24285
Gm20476	0.578598	2.24285
Rpl31-ps14	0.578598	2.24285
Gm16754	0.578598	2.24285
Gm37767	0.578598	2.24285
Gm37180	0.578598	2.24285
Gm37720	0.578598	2.24285
Gm19391	0.578598	2.24285
Rpl21-ps10	0.578598	2.24285
Gm44206	0.578598	2.24285
Gm10046	0.578598	2.24285
Gm45504	0.578598	2.24285
Gm35818	0.578598	2.24285
A930040O22Rik	0.578598	2.24285
Gm48905	0.578598	2.24285
Gm30054	0.578598	2.24285
Gm49477	0.578598	2.24285
5430434F05Rik	0.230477	2.23659
Sgcz	0.380137	2.23377
Olfr620	0.0298151	2.22929
Numbl	0.151149	2.22779
D130019J16Rik	0.190948	2.22729
Gm21293	0.581746	2.22581
Ccdc142os	0.149793	2.22482
Nxph1	0.251459	2.22041
Gm27651	0.233188	2.21861
Dnah2os	0.24633	2.21483
Olfr286	0.243557	2.20912
Cd2	0.449207	2.20571
1110018N20Rik	0.414237	2.20263
Ydjc	0.585765	2.20189
Upk1b	0.258175	2.20106
Aplp1	0.586006	2.20046
Tmem132a	0.586006	2.20046
Tex38	0.586006	2.20046
Mup5	0.586006	2.20046
Ifitm7	0.586006	2.20046
Rps15-ps2	0.586006	2.20046
Gm3715	0.586006	2.20046
Gm8805	0.586006	2.20046
Polr2k-ps	0.586006	2.20046
Gm13888	0.586006	2.20046
Olfr588-ps1	0.586006	2.20046
Shisa8	0.586006	2.20046
Gm5511	0.586006	2.20046
Gm38244	0.586006	2.20046
Gm42484	0.586006	2.20046
Gm45869	0.586006	2.20046
C330022B21Rik	0.586006	2.20046
Gm20167	0.586006	2.20046
Sh2d2a	0.586006	2.20046
Rph3a	0.586006	2.20046
Atp1b2	0.586006	2.20046
Ubxn10	0.586006	2.20046
Olfr433	0.586006	2.20046
Pcdhb3	0.586006	2.20046
Gpr85	0.586006	2.20046
Gp1ba	0.586006	2.20046
Gper1	0.586006	2.20046
Olfr285	0.586006	2.20046
Gm12933	0.586006	2.20046
Gm11191	0.586006	2.20046
Rps2-ps4	0.586006	2.20046
Slc36a1os	0.586006	2.20046
Gm20684	0.586006	2.20046
Gm20627	0.586006	2.20046
H2al1c	0.586006	2.20046
Foxl1	0.586006	2.20046
Gm26576	0.586006	2.20046
Gm37023	0.586006	2.20046
Gm47112	0.586006	2.20046
Gm47690	0.586006	2.20046
Gm18120	0.586006	2.20046
Gm47375	0.586006	2.20046
Gm10779	0.586006	2.20046
Gm18147	0.586006	2.20046
Gm46611	0.586006	2.20046
Gm50357	0.586006	2.20046
Lgr6	0.586006	2.20046
Olfr107	0.586006	2.20046
Gm37415	0.586006	2.20046
Gm48201	0.586006	2.20046
Rassf9	0.236087	2.1985
Ap2a1	0.116256	2.19014
Mybl2	0.0353089	2.18881
Gm37806	0.172061	2.17926
Gm43593	0.15135	2.17836
Olfr1381	0.258328	2.17299
Efcab7	0.089544	2.17094
Rgcc	0.0463752	2.16934
6720489N17Rik	0.202236	2.16785
Gm10300	0.168241	2.16515
Gm48365	0.213068	2.16458
Gm6787	0.462059	2.15953
Gm45627	0.462059	2.15953
Olfr596	0.462059	2.15953
AI197445	0.463632	2.15918
Smc2os	0.30735	2.15865
Tmprss11b	0.126627	2.15848
Cyp4f18	0.468846	2.15801
Gm36520	0.468846	2.15801
Atp10b	0.593677	2.15682
Ly6h	0.593677	2.15682
Grik1	0.593677	2.15682
Slc23a3	0.593677	2.15682
Fgf15	0.593677	2.15682
Ggn	0.593677	2.15682
Tceal3	0.593677	2.15682
Catsperz	0.593677	2.15682
Vwc2	0.593677	2.15682
1700041G16Rik	0.593677	2.15682
Gm7331	0.593677	2.15682
Gng3	0.593677	2.15682
Mpig6b	0.593677	2.15682
Olfr676	0.593677	2.15682
Gm14886	0.593677	2.15682
Gm12218	0.593677	2.15682
Gm15538	0.593677	2.15682
Rps15a-ps4	0.593677	2.15682
Gm1848	0.593677	2.15682
Gm16053	0.593677	2.15682
A730085K08Rik	0.593677	2.15682
Gm43721	0.593677	2.15682
Gm43713	0.593677	2.15682
Gm43990	0.593677	2.15682
Gm47049	0.593677	2.15682
Gm47822	0.593677	2.15682
Gm48882	0.593677	2.15682
2010203P06Rik	0.593677	2.15682
Gm5962	0.593677	2.15682
Gm49762	0.593677	2.15682
Gm46544	0.593677	2.15682
Gm9598	0.593677	2.15682
9630028I04Rik	0.593677	2.15682
Gm30541	0.593677	2.15682
AC154607.1	0.593677	2.15682
Podnl1	0.593677	2.15682
Cldn6	0.593677	2.15682
Mzb1	0.593677	2.15682
Dnajc5b	0.593677	2.15682
Zfp365	0.593677	2.15682
Tox3	0.593677	2.15682
Gm5805	0.593677	2.15682
n-R5s173	0.593677	2.15682
Gm25039	0.593677	2.15682
Zfp541	0.593677	2.15682
Gm14444	0.593677	2.15682
Gm26543	0.593677	2.15682
Gm28625	0.593677	2.15682
Pcdhga1	0.593677	2.15682
Gm43197	0.593677	2.15682
Gm44064	0.593677	2.15682
Gm39117	0.593677	2.15682
Gm30873	0.593677	2.15682
A230085B16Rik	0.593677	2.15682
Gm33056	0.593677	2.15682
Gm29844	0.593677	2.15682
Gm49164	0.593677	2.15682
5430440P10Rik	0.593677	2.15682
Gm20082	0.593677	2.15682
Gm49953	0.593677	2.15682
Gm49898	0.593677	2.15682
Gm8437	0.593677	2.15682
9530053A07Rik	0.593677	2.15682
Kantr	0.00532238	2.14975
Gpr161	0.430086	2.14274
Gm44848	0.431656	2.14231
Mmp24	0.431656	2.14231
Ppp1r14a	0.381484	2.14099
Wnk4	0.499164	2.13863
A530053G22Rik	0.336425	2.13769
Gm5917	0.0226458	2.13673
E030026E10Rik	0.22774	2.13649
Gm48298	0.310119	2.13627
Xlr4b	0.0272676	2.1358
Gm37065	0.292924	2.13329
Olfr981	0.134912	2.12784
Fam209	0.0388527	2.12327
Tmem81	0.177979	2.12089
Lypd5	0.194991	2.12055
Gm44724	0.18319	2.11927
Ch25h	0.28322	2.1183
Efcab5	0.429819	2.11744
Pax8	0.434396	2.11707
Gm8809	0.436021	2.11658
G6pd2	0.436021	2.11658
Fcrl6	0.20648	2.11592
Mir6236	0.441461	2.11497
Dtx3	0.441461	2.11497
Vpreb1	0.312943	2.10346
Unc13a	0.289646	2.09699
Pde1c	0.240181	2.09587
Vmn1r180	0.446858	2.08856
Gm37960	0.446858	2.08856
Gm25291	0.448493	2.08804
Gm50170	0.448493	2.08804
Zfp808	0.448493	2.08804
Gm16181	0.453926	2.08633
A030005L19Rik	0.453926	2.08633
Olfr648	0.453926	2.08633
C430042M11Rik	0.0898562	2.08581
Sfrp2	0.448903	2.08285
Il17re	0.448903	2.08285
Gm13785	0.448903	2.08285
Pcp4	0.448903	2.08285
Gm45632	0.444535	2.0818
Gm30082	0.444535	2.0818
Hormad2	0.00195198	2.08148
Gm47414	0.443222	2.08147
Gm50229	0.443222	2.08147
Noxred1	0.443222	2.08147
Gm12505	0.443222	2.08147
Atp1a2	0.0225045	2.08142
Tfeb	0.086817	2.07193
Gm45714	0.174283	2.06734
Gm24492	0.332874	2.06541
Txlnb	0.285076	2.06161
Gm26629	0.217554	2.05585
Capn6	0.107553	2.04793
Prtg	0.495798	2.04763
Gm26705	0.495798	2.04763
Gm37309	0.429443	2.04759
Phlda3	0.429443	2.04759
Npm2	0.429443	2.04759
Gm43887	0.429443	2.04759
Egfl6	0.42408	2.04621
Gm35725	0.42408	2.04621
Art2a	0.503057	2.04542
Tcrg-C4	0.299732	2.03904
Gm29459	0.305665	2.0342
Gm5970	0.111915	2.02944
Dab1	0.466477	2.02524
A430078I02Rik	0.461963	2.0243
Btla	0.460605	2.02401
Gm42872	0.460605	2.02401
Fam107a	0.460605	2.02401
Gm10389	0.460605	2.02401
Tpt1-ps6	0.251385	2.02377
Olfr1277	0.304399	2.02367
Gm38211	0.207763	2.02215
Gm13167	0.0295203	2.0192
Plek2	0.303458	2.01887
B3galt2	0.501302	2.01115
6530402F18Rik	0.501302	2.01115
Aoc3	0.501302	2.01115
Tmem117	0.501302	2.01115
2610012C04Rik	0.501302	2.01115
Far2	0.315958	2.00837
Vmn2r78	0.497568	2.00754
Gm6410	0.497568	2.00754
Rps6kl1	0.497568	2.00754
Cthrc1	0.497568	2.00754
Gm48335	0.497568	2.00754
Gm47054	0.497568	2.00754
Gm49655	0.497568	2.00754
Armc2	0.496447	2.00644
Gm39326	0.496447	2.00644
Tnfsf14	0.496447	2.00644
Krt14	0.496447	2.00644
Smim38	0.496447	2.00644
Gm11827	0.0611384	2.00261
Pcdh9	0.3272	1.99366
Olfr1338	0.47511	1.99084
Gm16349	0.31989	1.98764
Fmn2	0.0681742	1.97518
Gm14412	0.29634	1.96567
Pitpnm1	0.227308	1.96321
Ankrd23	0.0237613	1.95329
2900018N21Rik	0.325408	1.95206
Galnt3	0.254657	1.94911
Gm38340	0.254657	1.94911
Bex1	0.377158	1.94345
Tnxb	0.482993	1.9386
Gm15506	0.111216	1.93827
C530043A13Rik	0.477971	1.93459
Prrg4	0.403092	1.93402
Zfat	0.325235	1.93354
Vmn2r24	0.138567	1.9298
Ino80dos	0.512373	1.92953
Chst1	0.172392	1.92652
Cryab	0.0292429	1.9211
Gm43409	0.352789	1.92043
4930558N11Rik	0.0773165	1.91989
1700030C10Rik	0.264397	1.91729
9430060I03Rik	0.191601	1.90754
Cul7	0.0625709	1.90616
Timp1	0.128088	1.90408
Retnlg	0.13425	1.90338
Bnc1	0.398222	1.89622
Olfml2b	0.307087	1.88907
Gm47549	0.147941	1.88259
Gm49794	0.258118	1.88054
B230319C09Rik	0.524892	1.87964
Pakap	0.550293	1.87549
Cabp2	0.272685	1.87548
4933401D09Rik	0.371401	1.8705
Tshb	0.395338	1.86993
Gm37466	0.162086	1.86675
C530005A16Rik	0.372503	1.86576
Htra3	0.0331418	1.86414
Gm48357	0.249578	1.86314
Gm14302	0.391117	1.85296
Lrrn4cl	0.368226	1.84962
Gm9194	0.408401	1.84837
Gm13260	0.392078	1.847
Gm37121	0.102207	1.83921
Gm27645	0.264496	1.83872
4930563E22Rik	0.171804	1.82664
Apol7d	0.280734	1.81999
Fmn1	0.0092889	1.81588
Ptgis	0.160991	1.8125
Arntl2	0.201483	1.80635
Gm43300	0.294621	1.80395
Scn7a	0.321112	1.80016
Morn1	0.0804142	1.79961
Gm43999	0.0413057	1.79898
Slc22a7	0.251272	1.79675
Gm10044	0.209855	1.79632
Mapk4	0.436939	1.79254
Gm37717	0.339721	1.79016
Kcnk13	0.256685	1.78295
A630035G10Rik	0.220294	1.78017
C230035I16Rik	0.340539	1.77502
Hey2	0.546614	1.77466
Gm49429	0.336051	1.77233
Dact3	0.417411	1.7723
Igf2bp2	0.0762606	1.77197
Mirt1	0.552847	1.77106
Thsd4	0.406347	1.76819
A930017M01Rik	0.239117	1.76329
Gm40923	0.461939	1.76091
Hist1h2br	0.358419	1.7599
D830032E09Rik	0.551661	1.75699
Rbmxl2	0.0848607	1.75643
Proser3	0.306655	1.75417
Tor4a	0.192987	1.75385
Zfp85os	0.230023	1.7497
Gm2238	0.422485	1.749
Snord14c	0.582883	1.74894
Gm38134	0.582883	1.74894
Mamld1	0.582883	1.74894
4930547M16Rik	0.582883	1.74894
Rad54l2	2.27489e-06	1.74856
2310014F06Rik	0.58462	1.74846
Six4	0.358846	1.74798
Gm49273	0.0988847	1.7474
Gm22711	0.590391	1.7469
Gm48796	0.590391	1.7469
Pcdhb10	0.590391	1.7469
Rab3c	0.313671	1.74517
Gm44610	0.447466	1.74392
Greb1	0.241326	1.74149
Bax	0.359878	1.73715
Gm20276	0.383973	1.7371
Kcne3	0.421619	1.73058
Gm12953	0.466815	1.73004
4930550C14Rik	0.553734	1.72847
Olfr1440	0.55811	1.72664
5730507A11Rik	0.55811	1.72664
Gm42640	0.55811	1.72664
Vmn1r226	0.559856	1.72617
Gm10369	0.559856	1.72617
Gm37562	0.559856	1.72617
A630023P12Rik	0.559856	1.72617
Gm26728	0.559856	1.72617
Gm42700	0.56567	1.72459
Dnd1	0.56567	1.72459
Tcrg-C1	0.56567	1.72459
D7Bwg0826e	0.56567	1.72459
Gm10804	0.35647	1.72408
Stk26	0.303156	1.72241
Gm44202	0.399033	1.72207
Gm14288	0.644455	1.72137
Pygm	0.17045	1.7159
6430710C18Rik	0.475268	1.71135
Gm34983	0.553924	1.71093
Chst12	0.485785	1.71085
4930505N22Rik	0.454282	1.71065
Gm44927	0.364649	1.70798
Eaf2	0.103798	1.70685
Slc5a7	0.400428	1.70463
Gm45266	0.110758	1.7046
Gm21691	0.255675	1.70398
Tmprss11d	0.379222	1.70314
Synpo2	0.311196	1.7022
Gm5464	0.130364	1.70052
A530016L24Rik	0.569415	1.69653
Crocc	0.569415	1.69653
Gm20536	0.569415	1.69653
Gm45301	0.569415	1.69653
Ecrg4	0.569415	1.69653
Gm48707	0.367852	1.69513
Tifab	0.151791	1.69507
Trpm8	0.575324	1.69482
Smim41	0.575324	1.69482
Gm37248	0.575324	1.69482
AU018091	0.575324	1.69482
Zic1	0.575324	1.69482
Pdgfrl	0.214866	1.69111
Hotairm1	0.288903	1.6911
Gm29681	0.315979	1.69049
A530001N23Rik	0.487123	1.69013
Pik3ip1	0.145045	1.68972
Ttll11	0.608787	1.68943
Gm49265	0.256962	1.68937
Gm48964	0.223757	1.68776
Gm5655	0.430115	1.67875
Miox	0.345571	1.67621
Irak3	0.117298	1.67386
Gm33195	0.0545984	1.67367
Mroh2a	0.0870341	1.67237
Phactr1	0.321173	1.67177
Gm37639	0.261153	1.67138
Gm15491	0.359643	1.67133
C1qtnf4	0.442385	1.67019
1700021A07Rik	0.36079	1.66996
Gm47918	0.49432	1.66897
Fmr1nb	0.285623	1.66865
Gm48799	0.408735	1.66719
mt-Td	0.0828004	1.66302
Col20a1	0.509136	1.6604
Gm13261	0.32119	1.65975
Gm24968	0.472486	1.65921
Tbx6	0.539954	1.65882
C430019N01Rik	0.611209	1.65673
Adamtsl5	0.611209	1.65673
Gm6117	0.611209	1.65673
Gm43267	0.611209	1.65673
AC154200.1	0.611209	1.65673
4933406C10Rik	0.293982	1.65636
Gm2629	0.613	1.65622
Lypd6	0.613	1.65622
Gm43182	0.613	1.65622
Gm8899	0.613	1.65622
Gjc1	0.279711	1.6557
Acot10	0.618903	1.65458
Gm15074	0.618903	1.65458
Esp6	0.618903	1.65458
Gm29151	0.618903	1.65458
Acod1	0.618903	1.65458
Gm15696	0.618903	1.65458
1500005C15Rik	0.618903	1.65458
Tmem38a	0.144917	1.65009
BC018473	0.0635054	1.64864
Lrp2	0.507261	1.64703
Vmn2r95	0.359377	1.64693
Cnn1	0.581372	1.64504
Gm43817	0.345886	1.64426
4930481B07Rik	0.384454	1.63978
Usp11	0.427036	1.63953
Olfr90	0.104075	1.63637
Itgbl1	0.28093	1.6349
Gm38075	0.115914	1.63432
Gm12992	0.418315	1.6327
Cdc42ep5	0.459589	1.63098
Gm43509	0.35958	1.63082
Mss51	0.176966	1.6295
Rnf26	0.382349	1.62814
Gm11724	0.293873	1.62805
Gm42614	0.139174	1.6272
Stard9	0.0205365	1.62617
Gm30931	0.22682	1.62412
Foxb1	0.421993	1.62297
Cngb3	0.339937	1.6215
Wfikkn1	0.510852	1.61179
Trarg1	0.306201	1.61068
Nwd2	0.162153	1.60926
Gm36608	0.366578	1.60808
Ifit1bl2	0.48526	1.60806
4933433G19Rik	0.48526	1.60806
B830042I05Rik	0.447008	1.60776
Gm46136	0.478229	1.60555
Tgfb3	0.166705	1.59984
Vmn2r67	0.58997	1.59784
Cdh3	0.519887	1.59725
Hist1h4n	0.595168	1.59648
Trdc	0.595168	1.59648
Gm37697	0.595168	1.59648
Lrrc18	0.595168	1.59648
Gm10433	0.124314	1.59544
Angpt1	0.0742472	1.59414
Ngb	0.591036	1.59357
Gm13262	0.591036	1.59357
Gm43820	0.591036	1.59357
Gm48586	0.591036	1.59357
Gm9951	0.591036	1.59357
Scarna6	0.591036	1.59357
Gm27162	0.591036	1.59357
Gm43316	0.591036	1.59357
Gm42535	0.591036	1.59357
Mir5136	0.591036	1.59357
Far2os1	0.591036	1.59357
Gata3	0.37979	1.59356
Ager	0.5898	1.59268
Gm26774	0.5898	1.59268
A930001A20Rik	0.5898	1.59268
1700016D06Rik	0.5898	1.59268
Sec14l5	0.5898	1.59268
Cdh17	0.5898	1.59268
Larp6	0.5898	1.59268
Ppp1r26	0.5898	1.59268
Pcdhb4	0.5898	1.59268
Gm11753	0.5898	1.59268
1700037C18Rik	0.0939528	1.59059
Wdr93	0.0542481	1.58853
Mup-ps13	0.348012	1.58543
Gm47777	0.485499	1.58479
Gm10649	0.365861	1.58285
Gm37186	0.266331	1.57989
Gm30794	0.434156	1.57833
Pcdh7	0.0463436	1.57709
Gm36933	0.414796	1.57638
Epcam	0.325408	1.57369
Fndc1	0.358997	1.57139
Fbln2	0.179387	1.56636
Gm48611	0.493981	1.56575
C330024D21Rik	0.375158	1.56551
Gm17021	0.401252	1.56409
Gm30400	0.0245221	1.56362
Gm30698	0.490946	1.56083
Mdm1	0.19786	1.55886
D7Ertd443e	0.674308	1.55683
Gm45179	0.205407	1.55079
Iqce	0.0448015	1.55014
Olfr905	0.314882	1.5488
Gm45555	0.167304	1.54854
Gm14843	0.60982	1.54396
Fsd1	0.60982	1.54396
Gm22514	0.60982	1.54396
Gm12204	0.60982	1.54396
Gm7420	0.60982	1.54396
Gm3839	0.60982	1.54396
Gm9768	0.60982	1.54396
Gm7105	0.60982	1.54396
Smok3c	0.60982	1.54396
Gm38026	0.60982	1.54396
Gm44199	0.60982	1.54396
Kif22	0.121452	1.54337
Gm47693	0.126764	1.5414
Zfp583	0.605632	1.54135
Gm15982	0.605632	1.54135
Gm48069	0.605632	1.54135
Pcdhga11	0.605632	1.54135
Gm42455	0.605632	1.54135
Gm48348	0.605632	1.54135
Gm40513	0.605632	1.54135
Tmeff1	0.605632	1.54135
Vmn2r105	0.605632	1.54135
Muc13	0.604379	1.54056
Rpl28-ps2	0.604379	1.54056
Gm45546	0.604379	1.54056
Mamdc4	0.604379	1.54056
Srms	0.604379	1.54056
Vmn1r30	0.604379	1.54056
4921534A09Rik	0.604379	1.54056
Myo5c	0.235221	1.54024
Olfr652	0.0340302	1.53788
Olfr1437	0.476087	1.53782
Gm27003	0.504677	1.5375
AW495222	0.635062	1.53716
Gjc3	0.133032	1.53672
Gm44891	0.278796	1.53669
Gm43663	0.442241	1.53216
Tes3-ps	0.090028	1.52925
Mtus2	0.141416	1.52823
Gm12216	0.214933	1.52583
Ugt8a	0.48368	1.51619
Cd79b	0.48368	1.51619
Zc3h12b	0.481472	1.51522
Stmn2	0.292227	1.51367
Tnfrsf22	0.0817409	1.51274
C230053D17Rik	0.358276	1.5115
Cfap69	0.685944	1.50642
Mis18bp1	0.103891	1.50273
Cuedc1	0.320965	1.50207
Akap6	0.504993	1.50001
Zfp423	0.129169	1.4998
Gm30835	0.489119	1.49352
Gm36930	0.315257	1.49068
Angptl1	0.157567	1.49018
Cacna2d1	0.0764915	1.49014
Gm11619	0.42531	1.48719
Lrrn4	0.27887	1.4866
Gm43009	0.0481712	1.48618
Spink1	0.265786	1.48274
Zfp967	0.0166962	1.48125
1700109H08Rik	0.254155	1.4812
Gm15169	0.539108	1.48093
Pigl	0.0363387	1.48059
Foxc1	0.251243	1.47713
Hoxc8	0.717372	1.47702
Aif1l	0.717372	1.47702
Grik3	0.717372	1.47702
Nmrk2	0.717372	1.47702
Hspb7	0.717372	1.47702
Actn3	0.717372	1.47702
Rbfox1	0.717372	1.47702
Tbx1	0.717372	1.47702
Kcnq2	0.717372	1.47702
Aldh3a1	0.717372	1.47702
Jsrp1	0.717372	1.47702
Slc36a2	0.717372	1.47702
1700093K21Rik	0.717372	1.47702
Barx1	0.717372	1.47702
Fam217a	0.717372	1.47702
Ror2	0.717372	1.47702
Dcstamp	0.717372	1.47702
Vdr	0.717372	1.47702
Hoxc5	0.717372	1.47702
Apod	0.717372	1.47702
Vit	0.717372	1.47702
Myadml2	0.717372	1.47702
St8sia5	0.717372	1.47702
Slco5a1	0.717372	1.47702
Mstn	0.717372	1.47702
Myog	0.717372	1.47702
Kif5c	0.717372	1.47702
Ptx3	0.717372	1.47702
Celf3	0.717372	1.47702
Vwa5b1	0.717372	1.47702
Hpca	0.717372	1.47702
Art1	0.717372	1.47702
Tnmd	0.717372	1.47702
D630029K05Rik	0.717372	1.47702
Tmprss5	0.717372	1.47702
Fam83b	0.717372	1.47702
Lctl	0.717372	1.47702
Hhatl	0.717372	1.47702
6820408C15Rik	0.717372	1.47702
AA467197	0.717372	1.47702
Fa2h	0.717372	1.47702
Rasd2	0.717372	1.47702
Scn10a	0.717372	1.47702
1700020L24Rik	0.717372	1.47702
Ccdc180	0.717372	1.47702
Odf3l2	0.717372	1.47702
Frem2	0.717372	1.47702
Ovol2	0.717372	1.47702
Sh2d4b	0.717372	1.47702
Pln	0.717372	1.47702
Mybpc2	0.717372	1.47702
Alpk3	0.717372	1.47702
Minar1	0.717372	1.47702
Btbd16	0.717372	1.47702
Apobec2	0.717372	1.47702
Nkx6-2	0.717372	1.47702
Ptchd1	0.717372	1.47702
Inava	0.717372	1.47702
BC006965	0.717372	1.47702
Slco1a1	0.717372	1.47702
Mfap4	0.717372	1.47702
Ttc9	0.717372	1.47702
Olfr769	0.717372	1.47702
Mmp3	0.717372	1.47702
Tmem221	0.717372	1.47702
Sowaha	0.717372	1.47702
Tmem74b	0.717372	1.47702
Ppm1e	0.717372	1.47702
Nxph3	0.717372	1.47702
Tpcn2	0.717372	1.47702
Pla2g4e	0.717372	1.47702
Prokr2	0.717372	1.47702
Dcaf12l2	0.717372	1.47702
Msantd1	0.717372	1.47702
Trap1a	0.717372	1.47702
Gzmm	0.717372	1.47702
Kcnn4	0.717372	1.47702
Tmem74	0.717372	1.47702
Gm8724	0.717372	1.47702
Ryr3	0.717372	1.47702
Xlr3c	0.717372	1.47702
Mfap2	0.717372	1.47702
Galnt13	0.717372	1.47702
Obscn	0.717372	1.47702
Tmem91	0.717372	1.47702
Gm2423	0.717372	1.47702
Lmtk3	0.717372	1.47702
Tcp11	0.717372	1.47702
Olfr763	0.717372	1.47702
Olfr1387	0.717372	1.47702
Olfr1276	0.717372	1.47702
Gm22826	0.717372	1.47702
Gm23037	0.717372	1.47702
Gm26316	0.717372	1.47702
Ccdc87	0.717372	1.47702
Rnase13	0.717372	1.47702
Hist1h4m	0.717372	1.47702
Fcho1	0.717372	1.47702
Art5	0.717372	1.47702
Vmn2r34	0.717372	1.47702
Lsmem1	0.717372	1.47702
Gm1141	0.717372	1.47702
Olfr646	0.717372	1.47702
Ces1h	0.717372	1.47702
Hist2h3b	0.717372	1.47702
Wfdc6a	0.717372	1.47702
Ttll9	0.717372	1.47702
Foxs1	0.717372	1.47702
Olfr1256	0.717372	1.47702
Perm1	0.717372	1.47702
Pate13	0.717372	1.47702
Xirp1	0.717372	1.47702
Gm3242	0.717372	1.47702
Gm3286	0.717372	1.47702
Gm15737	0.717372	1.47702
Fdx2	0.717372	1.47702
Gm23881	0.717372	1.47702
Gm11506	0.717372	1.47702
Rps24-ps3	0.717372	1.47702
Gm13689	0.717372	1.47702
Gm14925	0.717372	1.47702
Gm12276	0.717372	1.47702
Gm13859	0.717372	1.47702
Gm15607	0.717372	1.47702
Gm8097	0.717372	1.47702
Gm11424	0.717372	1.47702
Gm13350	0.717372	1.47702
Ndufs6b	0.717372	1.47702
Rpl17-ps4	0.717372	1.47702
Gm13881	0.717372	1.47702
9430091E24Rik	0.717372	1.47702
Gm14562	0.717372	1.47702
Gm14261	0.717372	1.47702
Kbtbd8os	0.717372	1.47702
Gm15873	0.717372	1.47702
8430419K02Rik	0.717372	1.47702
Gm13571	0.717372	1.47702
2810433D01Rik	0.717372	1.47702
Gm16876	0.717372	1.47702
Nctc1	0.717372	1.47702
2310065F04Rik	0.717372	1.47702
Gm13236	0.717372	1.47702
1500009L16Rik	0.717372	1.47702
Rmrp	0.717372	1.47702
Snord2	0.717372	1.47702
Gm25363	0.717372	1.47702
Gm16565	0.717372	1.47702
Runx2os3	0.717372	1.47702
Gm16147	0.717372	1.47702
Gm17096	0.717372	1.47702
Vmn2r8	0.717372	1.47702
Gm17203	0.717372	1.47702
Gm20519	0.717372	1.47702
Gm20463	0.717372	1.47702
Olfr115	0.717372	1.47702
Gm20518	0.717372	1.47702
Gm23163	0.717372	1.47702
Mir5119	0.717372	1.47702
Hist2h3c1	0.717372	1.47702
Gm5117	0.717372	1.47702
Mrgpra2a	0.717372	1.47702
Vmn1r50	0.717372	1.47702
Gm13146	0.717372	1.47702
Olfr740	0.717372	1.47702
Olfr699	0.717372	1.47702
Gm7672	0.717372	1.47702
4930526L06Rik	0.717372	1.47702
9330111N05Rik	0.717372	1.47702
Gm26511	0.717372	1.47702
9330179D12Rik	0.717372	1.47702
Gm10814	0.717372	1.47702
Gm7497	0.717372	1.47702
Rps2-ps5	0.717372	1.47702
Gm6669	0.717372	1.47702
Gm28792	0.717372	1.47702
Gm28653	0.717372	1.47702
Gm29642	0.717372	1.47702
2310020H05Rik	0.717372	1.47702
Gm28659	0.717372	1.47702
Gm29112	0.717372	1.47702
Gm28723	0.717372	1.47702
1700025B11Rik	0.717372	1.47702
Gm28941	0.717372	1.47702
Rbm6-ps1	0.717372	1.47702
Ldhal6b	0.717372	1.47702
Gm28387	0.717372	1.47702
Gm19721	0.717372	1.47702
Gm38140	0.717372	1.47702
Gm38197	0.717372	1.47702
Gm37372	0.717372	1.47702
Gm37675	0.717372	1.47702
Gm37077	0.717372	1.47702
A730062M13Rik	0.717372	1.47702
Gm30414	0.717372	1.47702
Gm38325	0.717372	1.47702
Gm17952	0.717372	1.47702
Gm37500	0.717372	1.47702
5730408A14Rik	0.717372	1.47702
Gm43303	0.717372	1.47702
3110039M20Rik	0.717372	1.47702
Gm43023	0.717372	1.47702
Gm9057	0.717372	1.47702
Gm43244	0.717372	1.47702
Gm42589	0.717372	1.47702
Gm43017	0.717372	1.47702
4632404M16Rik	0.717372	1.47702
Gm27680	0.717372	1.47702
Gm43018	0.717372	1.47702
Gm43761	0.717372	1.47702
Gm43764	0.717372	1.47702
Gm43660	0.717372	1.47702
Gm43873	0.717372	1.47702
Gm19244	0.717372	1.47702
Gm44091	0.717372	1.47702
Gm44696	0.717372	1.47702
Gm44021	0.717372	1.47702
4930417O13Rik	0.717372	1.47702
Gm44415	0.717372	1.47702
Gm43931	0.717372	1.47702
Gm45081	0.717372	1.47702
Gm45039	0.717372	1.47702
Gm45516	0.717372	1.47702
Gm45757	0.717372	1.47702
D830024N08Rik	0.717372	1.47702
Gm20163	0.717372	1.47702
Gm30132	0.717372	1.47702
Gm48229	0.717372	1.47702
Gm31992	0.717372	1.47702
Gm47079	0.717372	1.47702
Gm47106	0.717372	1.47702
Gm48737	0.717372	1.47702
Gm39329	0.717372	1.47702
Gm47389	0.717372	1.47702
Gm39363	0.717372	1.47702
Gm39459	0.717372	1.47702
Gm31182	0.717372	1.47702
Gm8942	0.717372	1.47702
Gm48145	0.717372	1.47702
1110019B22Rik	0.717372	1.47702
C030006N10Rik	0.717372	1.47702
4921516A02Rik	0.717372	1.47702
Gm46332	0.717372	1.47702
Gm48778	0.717372	1.47702
Gm47447	0.717372	1.47702
Gm46436	0.717372	1.47702
Gm3791	0.717372	1.47702
Gm48593	0.717372	1.47702
Dio3os	0.717372	1.47702
Gm35755	0.717372	1.47702
Gm5374	0.717372	1.47702
Gm18883	0.717372	1.47702
Gm7644	0.717372	1.47702
Gm30127	0.717372	1.47702
Gm38409	0.717372	1.47702
Gm47273	0.717372	1.47702
Gm48200	0.717372	1.47702
Gm49268	0.717372	1.47702
Gm4681	0.717372	1.47702
Gm49182	0.717372	1.47702
Gm17882	0.717372	1.47702
Gm7691	0.717372	1.47702
Gm49879	0.717372	1.47702
Gm4701	0.717372	1.47702
Gm7773	0.717372	1.47702
Gm50094	0.717372	1.47702
Gm10503	0.717372	1.47702
Maskbp3	0.717372	1.47702
AC152938.1	0.717372	1.47702
AC197447.1	0.717372	1.47702
Rapsn	0.717372	1.47702
Rgs20	0.717372	1.47702
Hif3a	0.717372	1.47702
Ghrhr	0.717372	1.47702
Mcoln2	0.717372	1.47702
Igf2bp1	0.717372	1.47702
Prrt1	0.717372	1.47702
Ybx2	0.717372	1.47702
Lhx1	0.717372	1.47702
Fndc8	0.717372	1.47702
Il20ra	0.717372	1.47702
Slc7a15	0.717372	1.47702
Nova1	0.717372	1.47702
Ebf2	0.717372	1.47702
Jph4	0.717372	1.47702
Wbp2nl	0.717372	1.47702
Acr	0.717372	1.47702
Cyp2ab1	0.717372	1.47702
Tmprss15	0.717372	1.47702
Dhh	0.717372	1.47702
Sncg	0.717372	1.47702
Efhc2	0.717372	1.47702
Pnliprp2	0.717372	1.47702
Atp10a	0.717372	1.47702
Tgm4	0.717372	1.47702
Gria4	0.717372	1.47702
Lrrn2	0.717372	1.47702
Cubn	0.717372	1.47702
Hoxd8	0.717372	1.47702
Pex5l	0.717372	1.47702
Efna4	0.717372	1.47702
Mmp16	0.717372	1.47702
Gnrhr	0.717372	1.47702
Tmem116	0.717372	1.47702
Chrna7	0.717372	1.47702
Hapln3	0.717372	1.47702
Rab33a	0.717372	1.47702
Asb12	0.717372	1.47702
Nxf7	0.717372	1.47702
Otud7a	0.717372	1.47702
Apol6	0.717372	1.47702
Tnfsf9	0.717372	1.47702
Hoxc9	0.717372	1.47702
Rnf39	0.717372	1.47702
Xpnpep2	0.717372	1.47702
Actrt3	0.717372	1.47702
Asic3	0.717372	1.47702
Gpr34	0.717372	1.47702
Tex45	0.717372	1.47702
Pitpnm3	0.717372	1.47702
Lrrtm3	0.717372	1.47702
Rasef	0.717372	1.47702
1520401A03Rik	0.717372	1.47702
Rell2	0.717372	1.47702
Hepacam2	0.717372	1.47702
Lrfn4	0.717372	1.47702
Serinc4	0.717372	1.47702
Cym	0.717372	1.47702
C230012O17Rik	0.717372	1.47702
Olfr231	0.717372	1.47702
Foxc2	0.717372	1.47702
Gpr1	0.717372	1.47702
Pcdhb15	0.717372	1.47702
4930483J18Rik	0.717372	1.47702
Eno4	0.717372	1.47702
Cyb5r2	0.717372	1.47702
Fbxo43	0.717372	1.47702
A730049H05Rik	0.717372	1.47702
Htr1b	0.717372	1.47702
Morn4	0.717372	1.47702
2610318N02Rik	0.717372	1.47702
C130071C03Rik	0.717372	1.47702
1700020N01Rik	0.717372	1.47702
Creg2	0.717372	1.47702
Olfr523	0.717372	1.47702
1700014D04Rik	0.717372	1.47702
Lax1	0.717372	1.47702
Try4	0.717372	1.47702
Vsnl1	0.717372	1.47702
Tmprss11e	0.717372	1.47702
Ano9	0.717372	1.47702
Opn1sw	0.717372	1.47702
Col25a1	0.717372	1.47702
Olfr1265	0.717372	1.47702
Irx1	0.717372	1.47702
Krt5	0.717372	1.47702
Col23a1	0.717372	1.47702
Gm22248	0.717372	1.47702
Snord73a	0.717372	1.47702
Rny1	0.717372	1.47702
Zfp987	0.717372	1.47702
Olfr417	0.717372	1.47702
Gm3695	0.717372	1.47702
H2-Eb2	0.717372	1.47702
Tcf15	0.717372	1.47702
Tlx2	0.717372	1.47702
Sprr2a2	0.717372	1.47702
Hist1h4f	0.717372	1.47702
Prdm6	0.717372	1.47702
Gm24162	0.717372	1.47702
Vmn2r73	0.717372	1.47702
Gm10309	0.717372	1.47702
Timm8a2	0.717372	1.47702
Cfap44	0.717372	1.47702
Eddm3b	0.717372	1.47702
Gm10571	0.717372	1.47702
Gramd2	0.717372	1.47702
A930003A15Rik	0.717372	1.47702
Gm24048	0.717372	1.47702
Erich3	0.717372	1.47702
Mrpl48-ps	0.717372	1.47702
Msmp	0.717372	1.47702
Gm11281	0.717372	1.47702
Col4a3	0.717372	1.47702
Rpl28-ps3	0.717372	1.47702
Gm22486	0.717372	1.47702
Gm13815	0.717372	1.47702
Rps15a-ps7	0.717372	1.47702
Gm14760	0.717372	1.47702
Gm16089	0.717372	1.47702
Gm15132	0.717372	1.47702
Gm14769	0.717372	1.47702
Calr-ps	0.717372	1.47702
Gm11196	0.717372	1.47702
Gm16463	0.717372	1.47702
Gm11307	0.717372	1.47702
Gm15289	0.717372	1.47702
Gm14415	0.717372	1.47702
Gm13239	0.717372	1.47702
Fau-ps2	0.717372	1.47702
Gm6881	0.717372	1.47702
Gm8692	0.717372	1.47702
Gm12366	0.717372	1.47702
Gm11408	0.717372	1.47702
Gm5466	0.717372	1.47702
Gm2199	0.717372	1.47702
Gm7416	0.717372	1.47702
Gm12057	0.717372	1.47702
D930015M05Rik	0.717372	1.47702
Gm5577	0.717372	1.47702
Gm11335	0.717372	1.47702
2810455O05Rik	0.717372	1.47702
C130046K22Rik	0.717372	1.47702
Spag17os	0.717372	1.47702
Gm12320	0.717372	1.47702
Gm13479	0.717372	1.47702
Arhgap27os1	0.717372	1.47702
Gm12333	0.717372	1.47702
2810430I11Rik	0.717372	1.47702
Gm15612	0.717372	1.47702
Gm13827	0.717372	1.47702
Gm15199	0.717372	1.47702
Gm16201	0.717372	1.47702
Gm16015	0.717372	1.47702
9830144P21Rik	0.717372	1.47702
9530036M11Rik	0.717372	1.47702
Gm24916	0.717372	1.47702
Gm24009	0.717372	1.47702
Gm23119	0.717372	1.47702
Gm26287	0.717372	1.47702
Gm25443	0.717372	1.47702
2310075C17Rik	0.717372	1.47702
Gm16146	0.717372	1.47702
Gm15894	0.717372	1.47702
Nhlrc4	0.717372	1.47702
Pou3f1	0.717372	1.47702
Gm17090	0.717372	1.47702
Vmn2r45	0.717372	1.47702
Vmn1r34	0.717372	1.47702
Vmn2r14	0.717372	1.47702
Gm6548	0.717372	1.47702
Gm6611	0.717372	1.47702
Gm20540	0.717372	1.47702
Gm20535	0.717372	1.47702
Rn7s6	0.717372	1.47702
Gm20619	0.717372	1.47702
Gm5777	0.717372	1.47702
Gm24756	0.717372	1.47702
Gm20655	0.717372	1.47702
Gm26501	0.717372	1.47702
Gm23967	0.717372	1.47702
Gm27512	0.717372	1.47702
Olfr857	0.717372	1.47702
Gm28637	0.717372	1.47702
Gm8979	0.717372	1.47702
Gm5861	0.717372	1.47702
Gm7094	0.717372	1.47702
Olfr787	0.717372	1.47702
Gm5558	0.717372	1.47702
9230104M06Rik	0.717372	1.47702
Gm26600	0.717372	1.47702
Gm26873	0.717372	1.47702
Gm26585	0.717372	1.47702
Gm16677	0.717372	1.47702
Gm26748	0.717372	1.47702
4632411P08Rik	0.717372	1.47702
A730056A06Rik	0.717372	1.47702
B230217O12Rik	0.717372	1.47702
Gm8318	0.717372	1.47702
Mir6979	0.717372	1.47702
Gm8506	0.717372	1.47702
1700030L20Rik	0.717372	1.47702
2410012E07Rik	0.717372	1.47702
Zbed4-ps3	0.717372	1.47702
Rps10-ps2	0.717372	1.47702
Zbed4-ps2	0.717372	1.47702
Gm2396	0.717372	1.47702
Gm7539	0.717372	1.47702
Gm29292	0.717372	1.47702
Gm4017	0.717372	1.47702
Platr1	0.717372	1.47702
Gm8000	0.717372	1.47702
Olfr1217	0.717372	1.47702
Gm7858	0.717372	1.47702
A930006L05Rik	0.717372	1.47702
Rpl23a-ps5	0.717372	1.47702
Gm38352	0.717372	1.47702
Gm5100	0.717372	1.47702
Gm36987	0.717372	1.47702
Gm36638	0.717372	1.47702
Gm37899	0.717372	1.47702
Dchs2	0.717372	1.47702
Gm38164	0.717372	1.47702
Gm38251	0.717372	1.47702
Gm37633	0.717372	1.47702
Gm37151	0.717372	1.47702
Pcdhgb8	0.717372	1.47702
Gm37742	0.717372	1.47702
Gm37429	0.717372	1.47702
Pcdhga5	0.717372	1.47702
Pcdhgb4	0.717372	1.47702
Gm37809	0.717372	1.47702
Gm10748	0.717372	1.47702
Gm9442	0.717372	1.47702
Rps2-ps11	0.717372	1.47702
Gm10305	0.717372	1.47702
Gm43712	0.717372	1.47702
Gm43109	0.717372	1.47702
Gm42602	0.717372	1.47702
Gm42544	0.717372	1.47702
Gm47288	0.717372	1.47702
2610011E03Rik	0.717372	1.47702
Gm42983	0.717372	1.47702
Gm5281	0.717372	1.47702
Gm18901	0.717372	1.47702
Gm43856	0.717372	1.47702
Gm43187	0.717372	1.47702
Gm42975	0.717372	1.47702
Gm43703	0.717372	1.47702
4930425O10Rik	0.717372	1.47702
Gm6745	0.717372	1.47702
Gm42881	0.717372	1.47702
Gm42907	0.717372	1.47702
Gm43375	0.717372	1.47702
Gm42460	0.717372	1.47702
Rpl36-ps9	0.717372	1.47702
Gm9353	0.717372	1.47702
Gm43389	0.717372	1.47702
Gm42930	0.717372	1.47702
Gm42887	0.717372	1.47702
Gm43196	0.717372	1.47702
Gm42726	0.717372	1.47702
Gm15820	0.717372	1.47702
Gm3822	0.717372	1.47702
Gm43638	0.717372	1.47702
Gm34583	0.717372	1.47702
Gm7468	0.717372	1.47702
Gm44957	0.717372	1.47702
Gm30055	0.717372	1.47702
Gm44245	0.717372	1.47702
Gm43900	0.717372	1.47702
Gm8209	0.717372	1.47702
Gm44850	0.717372	1.47702
Olfr188-ps1	0.717372	1.47702
Gm45151	0.717372	1.47702
Gm45094	0.717372	1.47702
Gm44571	0.717372	1.47702
Gm44716	0.717372	1.47702
3110080E11Rik	0.717372	1.47702
Gm9712	0.717372	1.47702
Gm45626	0.717372	1.47702
Gm45389	0.717372	1.47702
Gm45598	0.717372	1.47702
9330121K16Rik	0.717372	1.47702
Gm31138	0.717372	1.47702
Gm8637	0.717372	1.47702
Olfr837	0.717372	1.47702
Gm45899	0.717372	1.47702
C78859	0.717372	1.47702
Gm47496	0.717372	1.47702
Gm48462	0.717372	1.47702
Olfr1328	0.717372	1.47702
Gm47528	0.717372	1.47702
Gm18996	0.717372	1.47702
Gm39460	0.717372	1.47702
Rmst	0.717372	1.47702
Gm32172	0.717372	1.47702
Gm49376	0.717372	1.47702
Gm48804	0.717372	1.47702
Gm5173	0.717372	1.47702
Gm18904	0.717372	1.47702
Gm18040	0.717372	1.47702
6030440G07Rik	0.717372	1.47702
Gm40576	0.717372	1.47702
Gm6109	0.717372	1.47702
Gm7045	0.717372	1.47702
Gm46369	0.717372	1.47702
Gm2270	0.717372	1.47702
Gm40916	0.717372	1.47702
Gm32376	0.717372	1.47702
Gm48899	0.717372	1.47702
Gm49246	0.717372	1.47702
Gm49256	0.717372	1.47702
Vmn1r20	0.717372	1.47702
Gm49471	0.717372	1.47702
D16Ertd519e	0.717372	1.47702
Gm34256	0.717372	1.47702
1700023B13Rik	0.717372	1.47702
Gm36200	0.717372	1.47702
Gm49838	0.717372	1.47702
Gm10817	0.717372	1.47702
Gm22219	0.717372	1.47702
Gm29819	0.717372	1.47702
Gm41717	0.717372	1.47702
4930414N06Rik	0.717372	1.47702
Gm41750	0.717372	1.47702
Gm50102	0.717372	1.47702
AL844494.3	0.717372	1.47702
Tbx4	0.717372	1.47702
Pax9	0.717372	1.47702
Acap1	0.717372	1.47702
Cd3g	0.717372	1.47702
Mybpc3	0.717372	1.47702
Pdxk-ps	0.717372	1.47702
Cd79a	0.717372	1.47702
Phyhip	0.717372	1.47702
9330159F19Rik	0.717372	1.47702
Cabp5	0.717372	1.47702
Slc44a4	0.717372	1.47702
Gabra1	0.717372	1.47702
4931406B18Rik	0.717372	1.47702
Chrne	0.717372	1.47702
Il19	0.717372	1.47702
Arfgef3	0.717372	1.47702
Slc5a8	0.717372	1.47702
Elane	0.717372	1.47702
Zpbp	0.717372	1.47702
Clhc1	0.717372	1.47702
Vsx2	0.717372	1.47702
Gng4	0.717372	1.47702
Pcsk1	0.717372	1.47702
Sema3g	0.717372	1.47702
Gm5546	0.717372	1.47702
Morc1	0.717372	1.47702
Sidt1	0.717372	1.47702
Tff2	0.717372	1.47702
Tff3	0.717372	1.47702
Rgs11	0.717372	1.47702
1700061G19Rik	0.717372	1.47702
Btnl2	0.717372	1.47702
Lvrn	0.717372	1.47702
Fbn2	0.717372	1.47702
Slc1a1	0.717372	1.47702
Gli1	0.717372	1.47702
6030468B19Rik	0.717372	1.47702
Map3k7cl	0.717372	1.47702
Alox5	0.717372	1.47702
St8sia2	0.717372	1.47702
1700007K13Rik	0.717372	1.47702
Chgb	0.717372	1.47702
Il12a	0.717372	1.47702
Mcub	0.717372	1.47702
Bend5	0.717372	1.47702
Calr4	0.717372	1.47702
Pax7	0.717372	1.47702
1700001C02Rik	0.717372	1.47702
Lrrc23	0.717372	1.47702
Pglyrp1	0.717372	1.47702
Cers3	0.717372	1.47702
Tmc5	0.717372	1.47702
Zkscan2	0.717372	1.47702
Dctd	0.717372	1.47702
Triml1	0.717372	1.47702
Irx5	0.717372	1.47702
Cngb1	0.717372	1.47702
Dnaaf1	0.717372	1.47702
Bean1	0.717372	1.47702
Pdzd3	0.717372	1.47702
Icam5	0.717372	1.47702
Cdhr4	0.717372	1.47702
Gria2	0.717372	1.47702
Galnt17	0.717372	1.47702
Spertl	0.717372	1.47702
1700006J14Rik	0.717372	1.47702
Nrip3	0.717372	1.47702
Nxnl1	0.717372	1.47702
Cdhr2	0.717372	1.47702
Epgn	0.717372	1.47702
Abca17	0.717372	1.47702
Phf24	0.717372	1.47702
Fxyd7	0.717372	1.47702
Cfap61	0.717372	1.47702
Fbxo27	0.717372	1.47702
Tbx10	0.717372	1.47702
Cldn11	0.717372	1.47702
Spag6	0.717372	1.47702
Ttc16	0.717372	1.47702
Chad	0.717372	1.47702
Eva1c	0.717372	1.47702
Ptger3	0.717372	1.47702
Gpr63	0.717372	1.47702
Slc26a7	0.717372	1.47702
Cmtm5	0.717372	1.47702
Serpina3h	0.717372	1.47702
Tnfrsf18	0.717372	1.47702
Zfp239	0.717372	1.47702
Mgat3	0.717372	1.47702
4930426D05Rik	0.717372	1.47702
Fam221b	0.717372	1.47702
Lca5l	0.717372	1.47702
Chrm2	0.717372	1.47702
Olfr984	0.717372	1.47702
Gapt	0.717372	1.47702
Pnlip	0.717372	1.47702
BC107364	0.717372	1.47702
Tmem150b	0.717372	1.47702
Vwa5b2	0.717372	1.47702
Cstad	0.717372	1.47702
A4galt	0.717372	1.47702
E130114P18Rik	0.717372	1.47702
Hcar1	0.717372	1.47702
Scn3b	0.717372	1.47702
Catsperg1	0.717372	1.47702
Lrrc4	0.717372	1.47702
Tmem150c	0.717372	1.47702
Rgs13	0.717372	1.47702
Fank1	0.717372	1.47702
Adamts18	0.717372	1.47702
Gm9930	0.717372	1.47702
Cyp3a44	0.717372	1.47702
2900041M22Rik	0.717372	1.47702
Wdr86	0.717372	1.47702
Gja6	0.717372	1.47702
Magea2	0.717372	1.47702
Dnaaf3	0.717372	1.47702
Olfr967	0.717372	1.47702
Fut2	0.717372	1.47702
Kcnq3	0.717372	1.47702
Slit3	0.717372	1.47702
Trnp1	0.717372	1.47702
Chst3	0.717372	1.47702
Olfr1415	0.717372	1.47702
Olfr739	0.717372	1.47702
4933430I17Rik	0.717372	1.47702
Rpl31-ps20	0.717372	1.47702
0610039K10Rik	0.717372	1.47702
Rps27a-ps2	0.717372	1.47702
Rps10-ps1	0.717372	1.47702
Rpl21-ps3	0.717372	1.47702
Rpl34-ps2	0.717372	1.47702
Vmn1r214	0.717372	1.47702
5730460C07Rik	0.717372	1.47702
Pym1	0.717372	1.47702
Scgb3a1	0.717372	1.47702
Trim38	0.717372	1.47702
Gm23626	0.717372	1.47702
Snord47	0.717372	1.47702
Gm25258	0.717372	1.47702
Gm24610	0.717372	1.47702
Gm26264	0.717372	1.47702
Gm22680	0.717372	1.47702
Gm10268	0.717372	1.47702
Gm3867	0.717372	1.47702
Vmn2r37	0.717372	1.47702
Unc93a	0.717372	1.47702
Usp51	0.717372	1.47702
B3galt4	0.717372	1.47702
Ssxb10	0.717372	1.47702
Gm7079	0.717372	1.47702
Vmn2r5	0.717372	1.47702
Pcgf1	0.717372	1.47702
9930111J21Rik1	0.717372	1.47702
[truncated: 20,150 more rows]
[truncated: 2 more columns]
