# Supplementary material for: GDF11 induces mild hepatic fibrosis independent of metabolic health
Source: publisher site journal article supplement (doi:10.18632/aging.104182), 2020-10-28
Supplement: Supplementary file [file aging-v12i20-104182-supplementary-material-SD2.pdf]

## SUPPLEMENTARY TABLES

**Supplementary Table 1. Anthropometric, clinical and pathological features of 33 morbidly obese patients (BMI average 45.02 ± 6.41).**

| Clinical/pathologic characteristics of morbidly obese patients (n=33) |                |
|-----------------------------------------------------------------------|----------------|
| Age (years)                                                           | 37 ± 10.37     |
| Gender (M/F)                                                          | 9/25           |
| Weight (kg)                                                           | 123.74 ± 18.71 |
| BMI (kg/m <sup>2</sup> )                                              | 45.02 ± 6.41   |
| HDL - cholesterol (mg/dL)                                             | 52.03 ± 15.07  |
| LDL - cholesterol (mg/dL)                                             | 116.05 ± 30.47 |
| Total cholesterol (mg/dL)                                             | 192.28 ± 31.29 |
| Triglycerides (mg/dL)                                                 | 120.97 ± 60.27 |
| ALT (IU/L)                                                            | 38.91 ± 29.13  |
| AST (IU/L)                                                            | 25.37 ± 15.48  |
| GGT (IU/L)                                                            | 52.37 ± 144.46 |
| Total Bilirubin (mg/dL)                                               | 0.44 ± 0.2     |
| Blood glucose (mg/dL)                                                 | 96.35 ± 32.62  |
| Insulin (mIU/L)                                                       | 28.93 ± 24.31  |
| HOMA-IR                                                               | 7.81 ± 8.38    |
| Hb1Ac (%)                                                             | 5.71 ± 0.49    |
| <i>Kleiner steatosis grade</i>                                        |                |
| 0                                                                     | 4              |
| 1                                                                     | 11             |
| 2                                                                     | 6              |
| 3                                                                     | 12             |
| <i>Kleiner lobular inflammation grade</i>                             |                |
| 0                                                                     | 4              |
| 1                                                                     | 18             |
| 2                                                                     | 9              |
| 3                                                                     | 2              |
| <i>Kleiner ballooning score</i>                                       |                |
| 0                                                                     | 12             |
| 1                                                                     | 12             |
| 2                                                                     | 9              |

**Supplementary Table 2. Pearson's correlation between GDF11 mRNA and clinical/pathological characteristics of morbidly obese patients (n=33).**

|                   | GDF11 mRNA |        |
|-------------------|------------|--------|
|                   | r          | p      |
| Age               | 0.1203     | 0.4978 |
| Gender            | -0.023     | 0.90   |
| BMI               | 0.094      | 0.5967 |
| ALT               | 0.2745     | 0.1221 |
| AST               | 0.017      | 0.9279 |
| GGT               | 0.0366     | 0.8423 |
| Total Bilirubin   | 0.084      | 0.639  |
| HDL               | -0.1740    | 0.366  |
| LDL               | 0.093      | 0.631  |
| Total cholesterol | -0.0273    | 0.888  |
| Triglycerides     | -0.088     | 0.645  |
| Blood glucose     | 0.2981     | 0.08   |
| Insulin           | 0.1650     | 0.401  |
| HOMA-IR           | 0.3174     | 0.1141 |
| HbA1c             | 0.1231     | 0.5247 |

|                                 |               |               |
|---------------------------------|---------------|---------------|
| <i>Kleiner Score (0-8)</i>      | <b>0.3664</b> | <b>0.0360</b> |
| <i>Steatosis grade (0-3)</i>    | 0.2946        | 0.1077        |
| <i>Inflammation score (0-3)</i> | 0.2778        | 0.1303        |
| <i>Ballooning score (0-2)</i>   | 0.3450        | 0.057         |

Supplementary Table 3. Pearson's correlation between GDF11 mRNA and glucose/insulin characteristics in the obese patients with either NASH (n=13) or NAFLD (n=20).

| NAFLD                       | GDF11 mRNA           | GDF11 mRNA     | GDF11 mRNA     |
|-----------------------------|----------------------|----------------|----------------|
|                             | vs.<br>Blood glucose | vs.<br>Insulin | vs.<br>HOMA-IR |
| Pearson r                   | -0.4711              | -0.3572        | -0.3437        |
| P value                     | 0.036                | 0.1744         | 0.2289         |
| P value summary             | *                    | ns             | ns             |
| Significant? (alpha = 0.05) | Yes                  | No             | No             |

  

| NASH                        | GDF11 mRNA           | GDF11 mRNA     | GDF11 mRNA     |
|-----------------------------|----------------------|----------------|----------------|
|                             | vs.<br>Blood glucose | vs.<br>Insulin | vs.<br>HOMA-IR |
| Pearson r                   | -0.0949              | -0.2043        | -0.1818        |
| P value                     | 0.7577               | 0.5242         | 0.5717         |
| P value summary             | ns                   | ns             | ns             |
| Significant? (alpha = 0.05) | No                   | No             | No             |

Supplementary Table 4. The primer sequences used in this study.

| Gene         |                         | Sequence (5'-3')          |
|--------------|-------------------------|---------------------------|
| Homo sapiens | VIMENTIN                | F AGTCCACTGAGTACCGGAGAC   |
|              |                         | R CATTTCACGCATCTGGCGTTC   |
|              | COL5A1                  | F TACAACGAGCAGGGTATCCAG   |
|              |                         | R ACTTGCCATCTGACAGGTTGA   |
|              | MMP2                    | F TACAGGATCATTGGCTACACACC |
|              |                         | R GGTCACATCGCTCCAGACT     |
|              | COL1A1                  | F GTGCGATGACGTGATCTGTGA   |
|              |                         | R CGGTGGTTTCTTGGTCGGT     |
|              | ACTA2                   | F AAAAGACAGCTACGTGGGTGA   |
|              |                         | R GCCATGTTCTATCGGGTACTTC  |
|              | TIMP1                   | F ACCACCTTATACCAGCGTTATGA |
|              |                         | R GGTGTAGACGAACCGGATGTC   |
|              | GDF11                   | F CCACCACCGAGACCGTCATT    |
|              |                         | R GAGGGCTGCCATCTGTCTGT    |
|              | GAPDH                   | F GGTGCGTGCCAGTTGA        |
|              |                         | R TACTTTCTCCCCGCTTTT      |
| ACTB         | F CATGTACGTTGCTATCCAGGC |                           |
|              | R CTCCTTAATGTCACGCACGAT |                           |
